# Editorial

---

Urol Int 1990;45:197

The invention of ultrasound turned out to be a milestone in urologic diagnosis. Considering that computed tomography is really only a refined and practical further development of the once revolutionary X-ray technology, no new technical procedure has proven more successful since the introduction of intravenous urography.

The possibilities of using ultrasound in urology were therefore the main theme at the Swiss Urologists' Congress in 1989. This issue contains the very best works presented. The main topics are how to optimize diagnosis and where the limits of today's technology are. Further useful advice for urologic routine diagnosis is given.

At the congress the following problem crystallized. On the one hand, we find radiologists and urologists taking an almost playful pleasure in the technical finesses and thereby occasionally forgetting the important clinical aspect. On the other hand, from time to time practical-minded clinicians have rather vague conceptions of the technique discussed. There is a certain risk that, because of the present lack of understanding, errors are committed on both sides. The congress and this issue of *Urologia Internationalis* aim to achieve a better mutual understanding.

D. Hauri, Zürich
